# Supplementary material for: Intramolecular interaction induced C–C cleavages in fructose conversion in polar aprotic solvents—origin of the formation of excess formic acid and oligomers
Source: Royal Society of Chemistry journal article supplement (doi:10.1039/d4cp03317e), 2024-01-01
Supplement: d4cp03317e1.pdf [file d4cp03317e1.pdf]

## Intramolecular Interaction Induced C-C Cleavages in Fructose Conversion in Polar Aprotic Solvents — Origin of the Formation of Excess Formic Acid and Oligomers

*Chenyu Ge<sup>a</sup>, Qianxin Sun<sup>a</sup>, Ruoyu Zhang<sup>a</sup>, Liangfang Zhu<sup>a</sup> and Changwei Hu<sup>\*a</sup>*

<sup>a</sup>Key Laboratory of Green Chemistry and Technology, Ministry of Education, College of Chemistry, Sichuan University, Chengdu, Sichuan 610064, P. R. China.

### AUTHOR INFORMATION

#### Corresponding Author

\*Email: [changwei.hu@scu.edu.cn](mailto:changwei.hu@scu.edu.cn)

#### The PDF file includes:

Materials and Methods

Simulation Details

Table. S1 to S5

Figure. S1 to S23

References

## Materials and Methods

### Materials

All reagents were obtained from Chengdu Kelong Chemical Co., Ltd. without further purification.

### Methods

In a regular reaction, a 50 mL reactor was used to study the reaction of fructose. Firstly, 50 mg D-fructose, and 10 mL MTHF were added to the reactor (purchased from Beijing Century Senlong experimental apparatus Co., Ltd). The reaction temperature was set at 120 °C and the stirring speed was 300 r min<sup>-1</sup>. After the reaction, the reactor was cooled to room temperature, and the mixture was filtered. The solution was analysed qualitatively using High-Performance Liquid Chromatography (HPLC, Waters-e2695). The formulae for product-related calculations are given in Equations (1).

$$\text{The mol yield of products} = \frac{\text{The mol of product}}{\text{the mol of fructose}} \times 100\% \quad (1)$$

HPLC: The content of raw materials in the reaction solution was tested with high-performance liquid chromatography (HPLC, Waters-e2695, equipped with Bio-Rad Aminex HPX-87H Column).

## Simulation Details

Molecular dynamics (MD) simulation for the minimization of each system was conducted by the steepest descent method with an emtol value of  $100.0 \text{ kJ/mol}^{-1}$ . Then NPT equilibration (where N, P, and T stand for the number of particles, pressure, and temperature) was conducted to achieve the target temperature (393 K) and real pressure for each solvent system (THF: 3.8 bar, DIO: 2.6 bar, MIBK: 3.3 bar, NMP : 1.8 bar, GVL : 1.6 bar, DMSO: 1.8 bar)<sup>1</sup> with md integrator (leap-frog algorithm). The time step for integration was 1 fs and the whole time for equilibration was 400 ps. The systems were all coupled from 0 K to 393 K during the first 200 ps linearly and stayed at 393 K during the rest time controlled by the simulated annealing algorithm. The Berendsen pressure coupling with a time constant of 1 ps and the V-rescale temperature coupling with a time constant of 1 ps were used in the NPT equilibration. Subsequently, the Production MD was initiated for 50 ns at 393 K and real pressure for each solvent with a time step of 1 fs with around fifty million steps in total. The Parrinello–Rahman barostat with a time constant of 4 ps and V-rescale thermostat algorithms with a time constant of 1 ps were utilized in the Production MD simulation.

Table S1. The comparison of potential transition states with H<sub>2</sub>O assistance proton transfer steps in THF.

| Transition states | Energy Barriers (kcal/mol) |                             |
|-------------------|----------------------------|-----------------------------|
|                   | -OH group assistance       | H <sub>2</sub> O assistance |
| TS3               | 39.07                      | 47.37                       |
| TS5               | 42.51                      | 48.66                       |
| TSh1a             | 44.76                      | 58.40                       |
| TSDGE             | 39.13                      | 43.53                       |
| TSf0              | 36.55                      | 42.31                       |

**Table S2.** The comparison of TOF ( $s^{-1}$ ) for FA, FAL, HMF pathways in DIO.

| Paths                             | FA       | FAL_C3   | FAL      | HMF_C3   | HMF_C1   |
|-----------------------------------|----------|----------|----------|----------|----------|
| TDI                               | Fructose | IMa2     | Fructose | IMh5     | Fructose |
| TDTS                              | TS1      | TSDGE-1  | TSh1a    | TSh06    | TSh1a    |
| $\Delta G^\ddagger$<br>(kcal/mol) | 43.45    | 43.66    | 44.82    | 43.84    | 44.82    |
| $\Delta G_r$<br>(kcal/mol)        | -27.65   | -24.8    | -24.8    | -42.84   | -42.84   |
| TOF ( $s^{-1}$ )                  | 5.23E-12 | 4.04E-12 | 7.62E-13 | 1.89E-12 | 6.24E-13 |

**Table S2.** The comparison of TOF ( $s^{-1}$ ) for FA, FAL, HMF pathways in MTHF.

| Paths                             | FA       | FAL_C3   | FAL      | HMF_C3   | HMF_C1   |
|-----------------------------------|----------|----------|----------|----------|----------|
| TDI                               | Fructose | IMa2     | Fructose | IMh5     | IMh5     |
| TDTS                              | TS1      | TSDGE-1  | TSh1a    | TSh06    | TSh06    |
| $\Delta G^\ddagger$<br>(kcal/mol) | 43.01    | 44.10    | 43.42    | 49.11    | 49.11    |
| $\Delta G_r$<br>(kcal/mol)        | -29.78   | -54.63   | -54.63   | -51.06   | -51.06   |
| TOF ( $s^{-1}$ )                  | 7.50E-12 | 2.28E-12 | 5.51E-12 | 4.10E-15 | 4.11E-15 |

**Table S3.** The comparison of TOF ( $s^{-1}$ ) for FA, FAL, HMF pathways in MIBK.

| Paths                             | FA       | FAL_C3   | FAL      | HMF_C3   | HMF_C1   | AA        |
|-----------------------------------|----------|----------|----------|----------|----------|-----------|
| TDI                               | Fructose | IMa2     | Fructose | IMh5     | IMh5     | IMb -mibk |
| TDTS                              | TS1      | TSDGE-1  | TSh1a    | TSh06    | TSh06    | TSb -mibk |
| $\Delta G^\ddagger$<br>(kcal/mol) | 43.74    | 44.16    | 45.71    | 45.59    | 45.71    | 42.56     |
| $\Delta G_r$<br>(kcal/mol)        | -28.99   | -27.79   | -27.79   | -46.57   | -46.57   | -35.96    |
| TOF ( $s^{-1}$ )                  | 3.45E-12 | 2.15E-12 | 3.10E-13 | 3.18E-13 | 1.68E-13 | 1.15E-11  |

**Table S4.** The conversion of fructose in the initial reaction stage in MTHF solvent. <sup>[a]</sup>

| Reaction Time | Yields [mol %] |      |    |    |
|---------------|----------------|------|----|----|
|               | HMF            | FA   | AA | LA |
| 30 min        | -              | 4.43 | -  | -  |
| 60 min        | -              | 5.70 | -  | -  |

[a] Reaction conditions: 27.8 mM fructose (50 mg), MTHF solvent (10 mL), 120 °C.



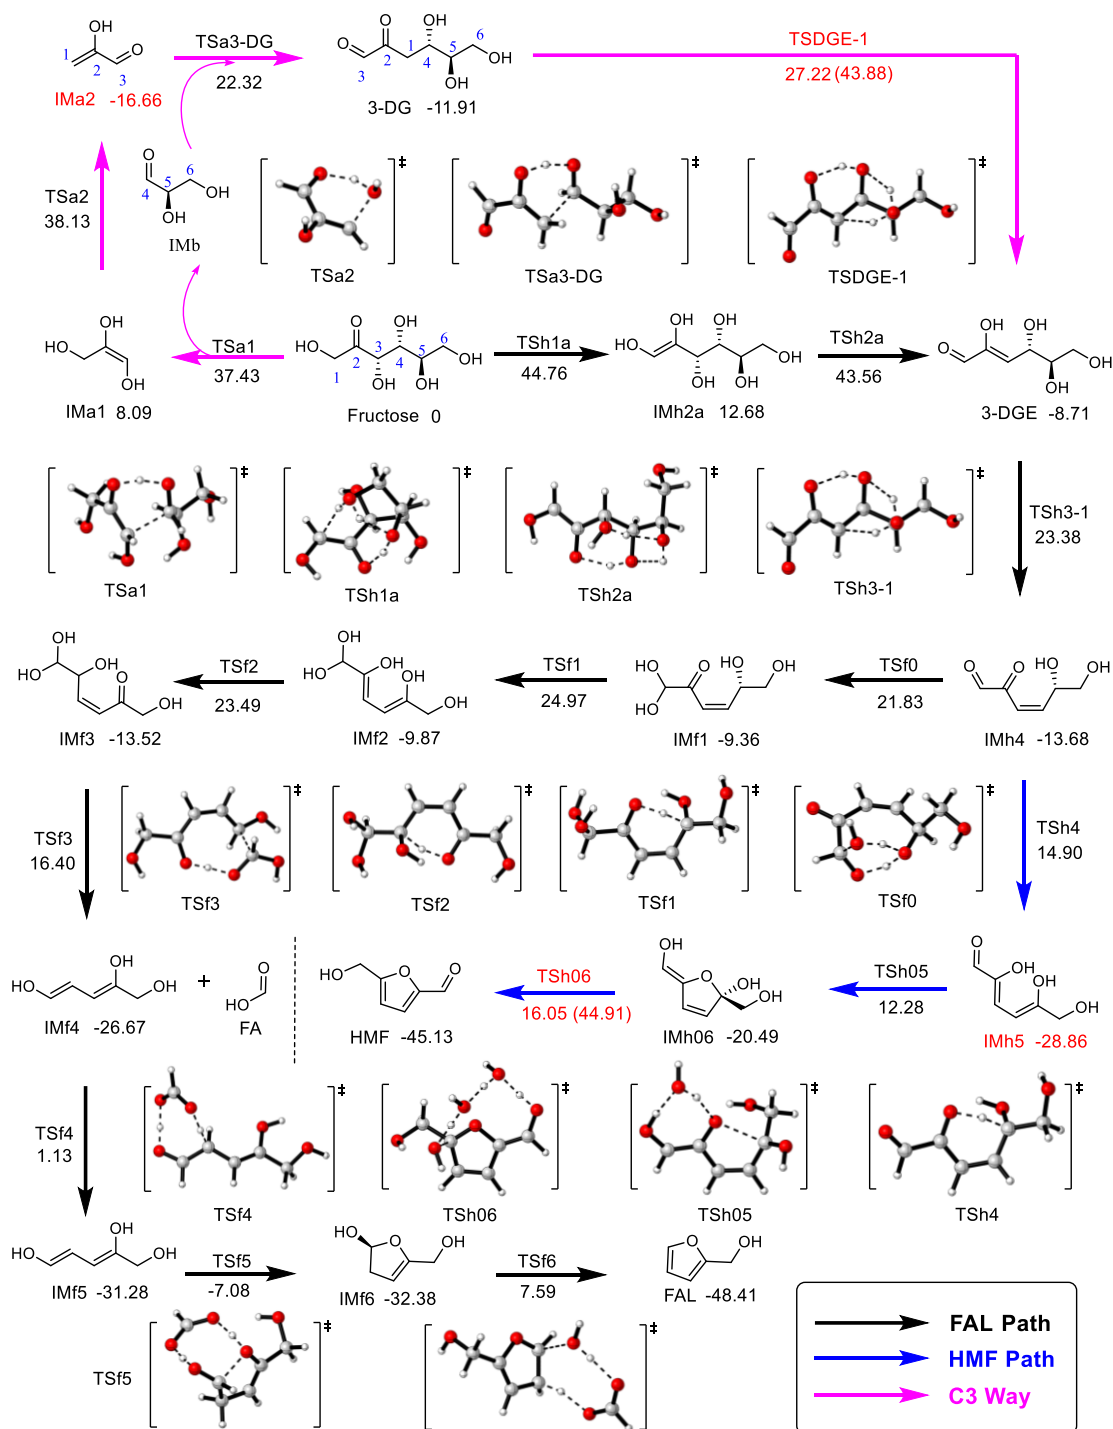

**Figure S1.** The detailed pathways of **HMF Path** and **FAL Path** in THF. The relative Gibbs free energy ( $\Delta G/\Delta G^\ddagger$ ) data were shown in the figure with unit kcal/mol. The carbons were mainly labelled in black, and those carbons coloured in blue showed the carbon rearrangement. The RD-states for the formation of FA and HMF were coloured in red.

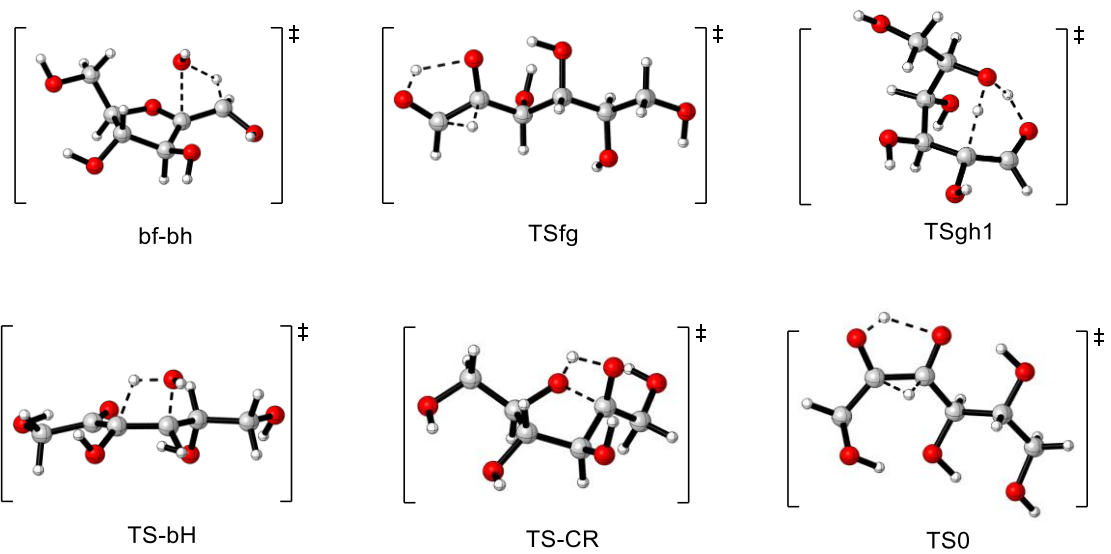

**Figure S2.** Transition states of other reactions of fructose in THF.

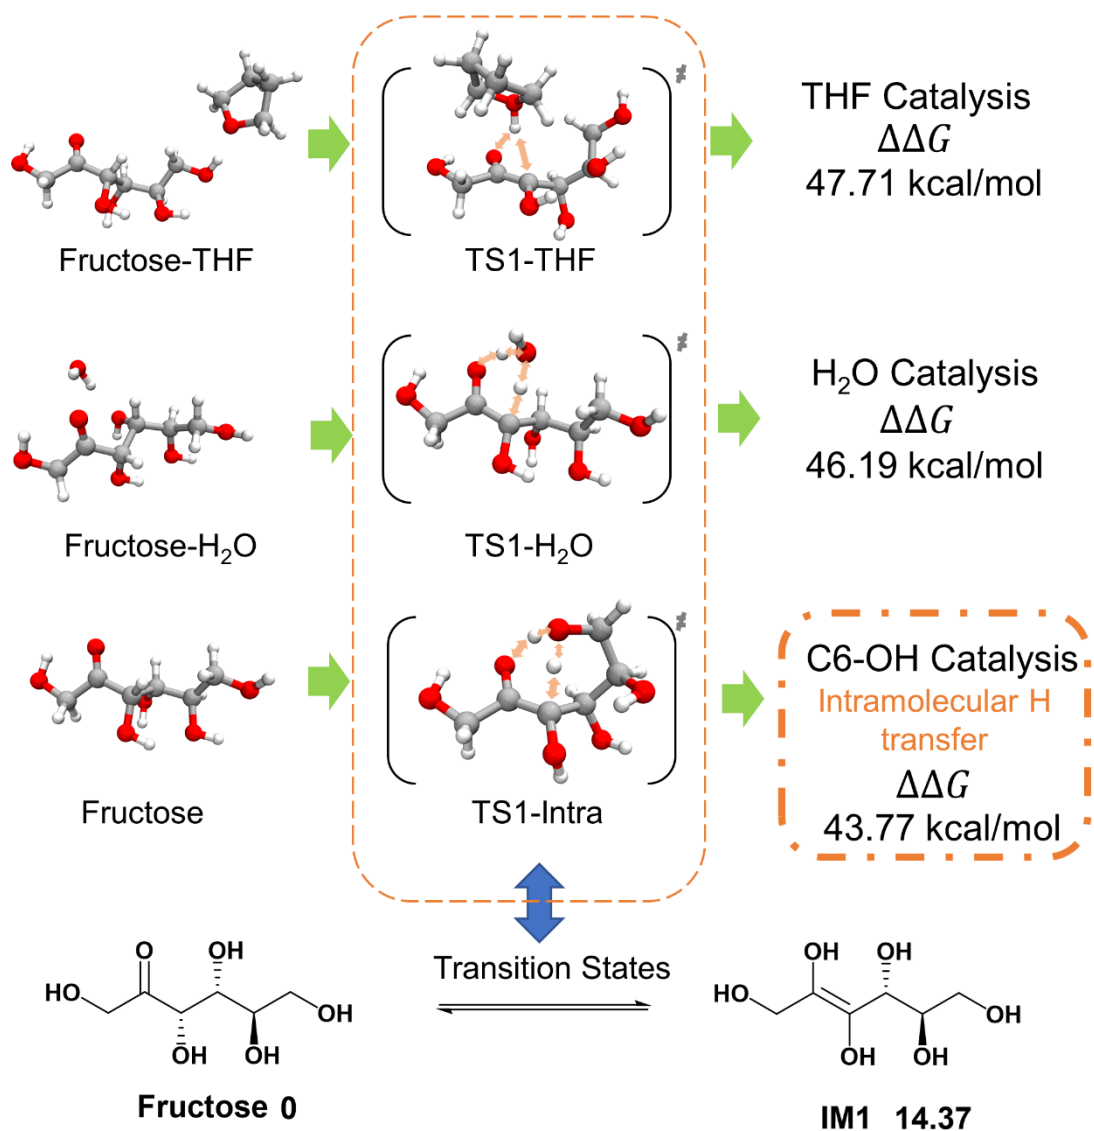

**Figure S3.** The comparison of THF catalysis, water catalysis and C6-OH catalysis of keto-enol tautomerization of fructose to IM1.

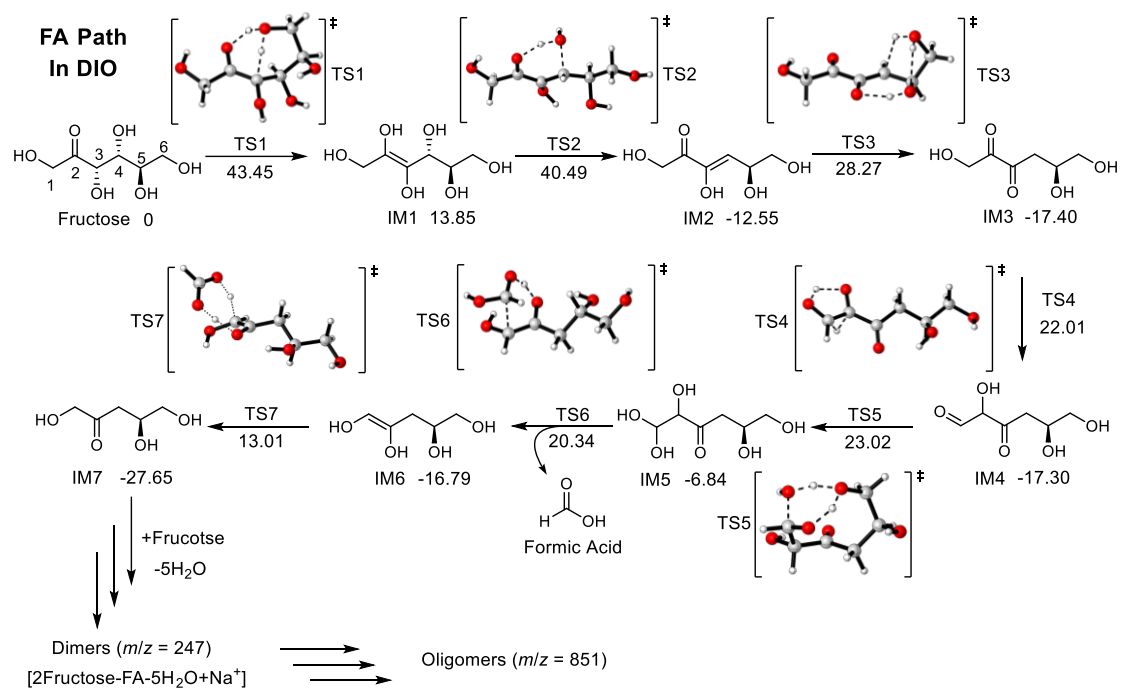

**Figure S4.** The reaction path and relative Gibbs free energy of FA Path in DIO solvent.

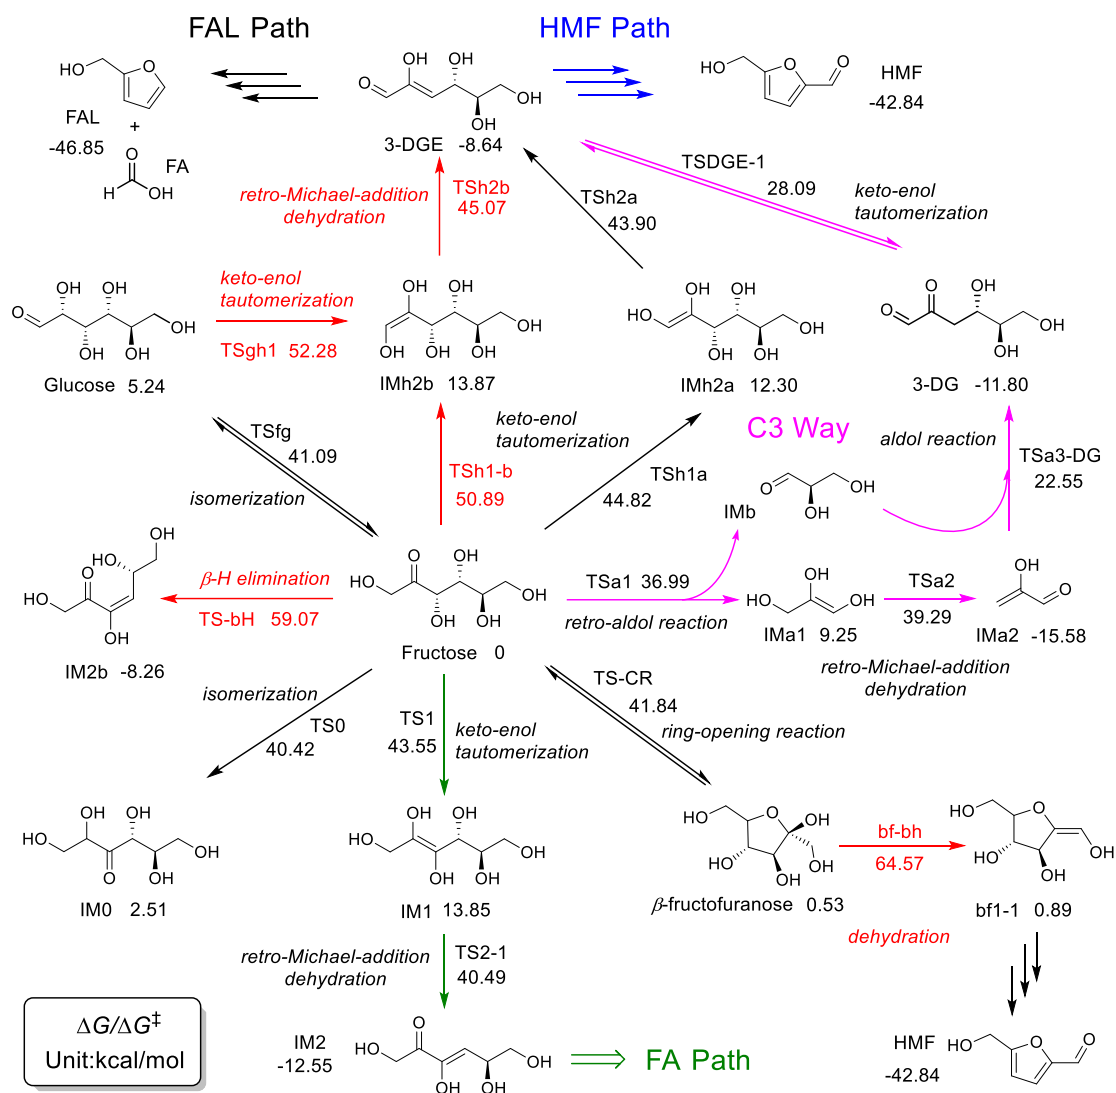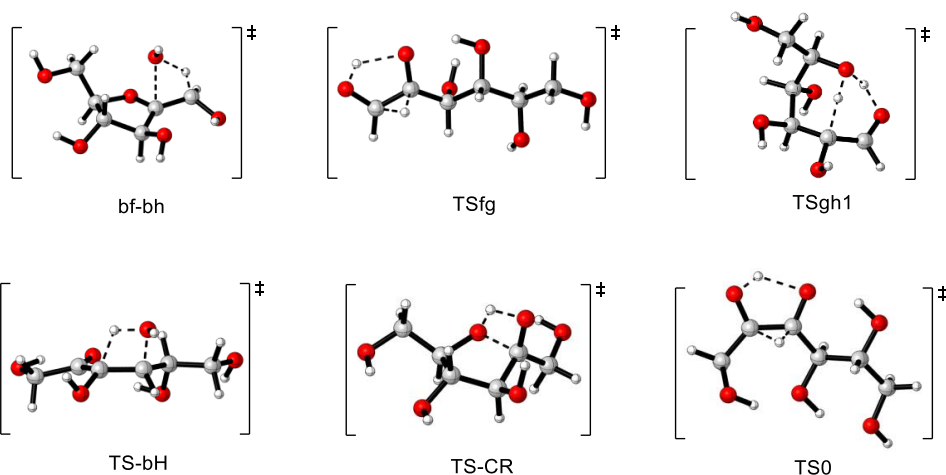

**Figure S5.** The possible reactions occurred to fructose in DIO solvent. The relative Gibbs free energy ( $\Delta G/\Delta G^\ddagger$ ) data was shown in the figure with unit **kcal/mol**. The reaction steps with high energy barrier (above 45 kcal/mol) were coloured in red.

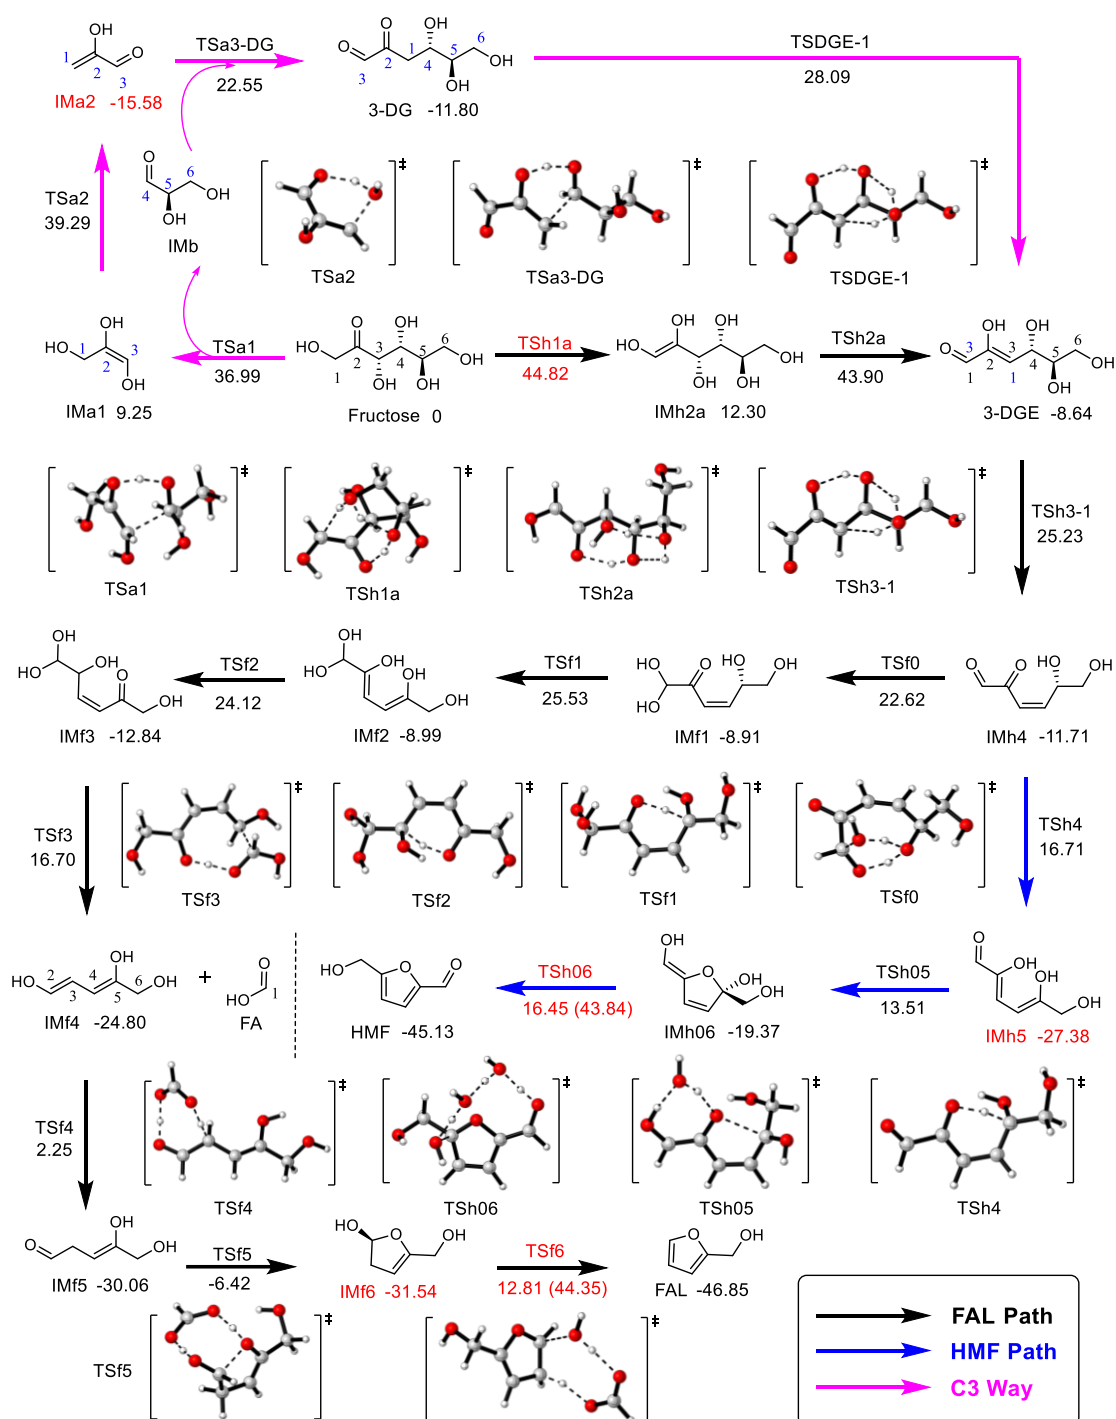

**Figure S6.** The detail pathways of **HMF Path** and **FAL Path** in DIO. The data of relative Gibbs free energy of structures and energy barriers ( $\Delta G/\Delta G^\ddagger$ ) was shown in the figure with unit **kcal/mol**. The carbons were mainly labelled in black, and those labelled in blue showed the carbon arrangement. The RD-states for the formation of FA and HMF were coloured in red.

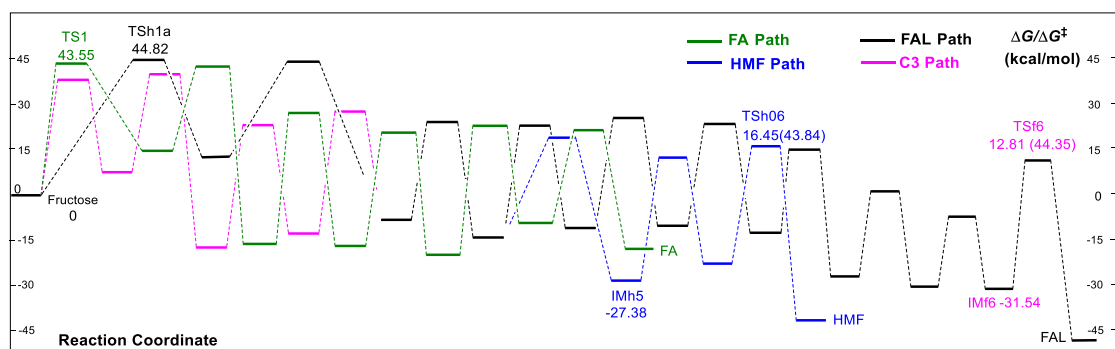

**Figure S7.** The potential-energy curves of reaction pathways for FA, FAL and HMF in DIO. The data of relative Gibbs free energy of structures and energy barriers ( $\Delta G/\Delta G^\ddagger$ ) was shown in the figure with unit **kcal/mol**.

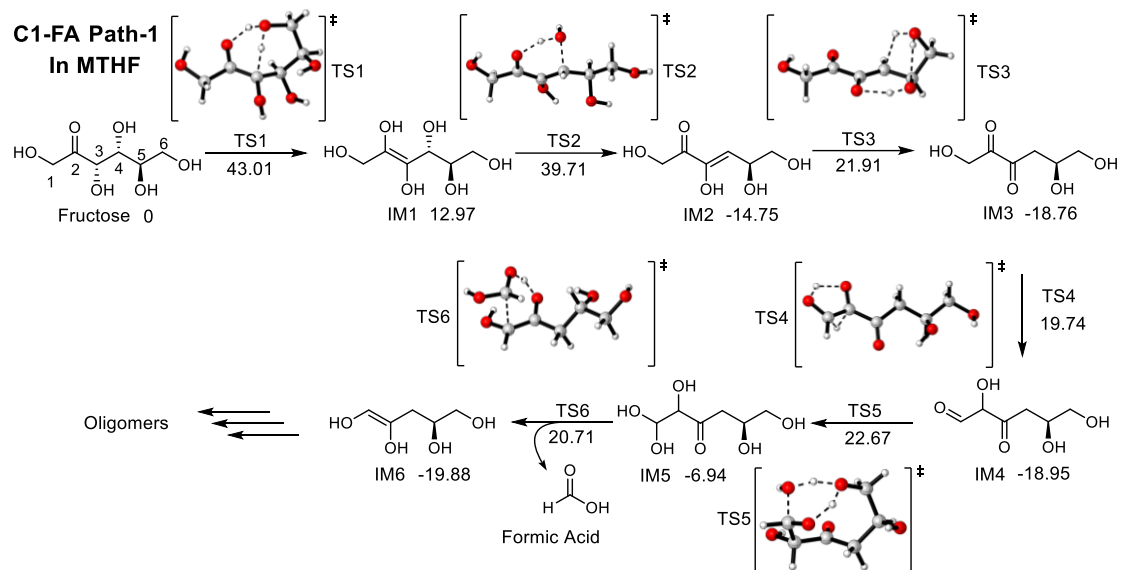

**Figure S8.** The reaction path of FA Path in MTHF solvent. The data of relative Gibbs free energy of structures and energy barriers ( $\Delta G/\Delta G^\ddagger$ ) was shown in the figure with unit kcal/mol.



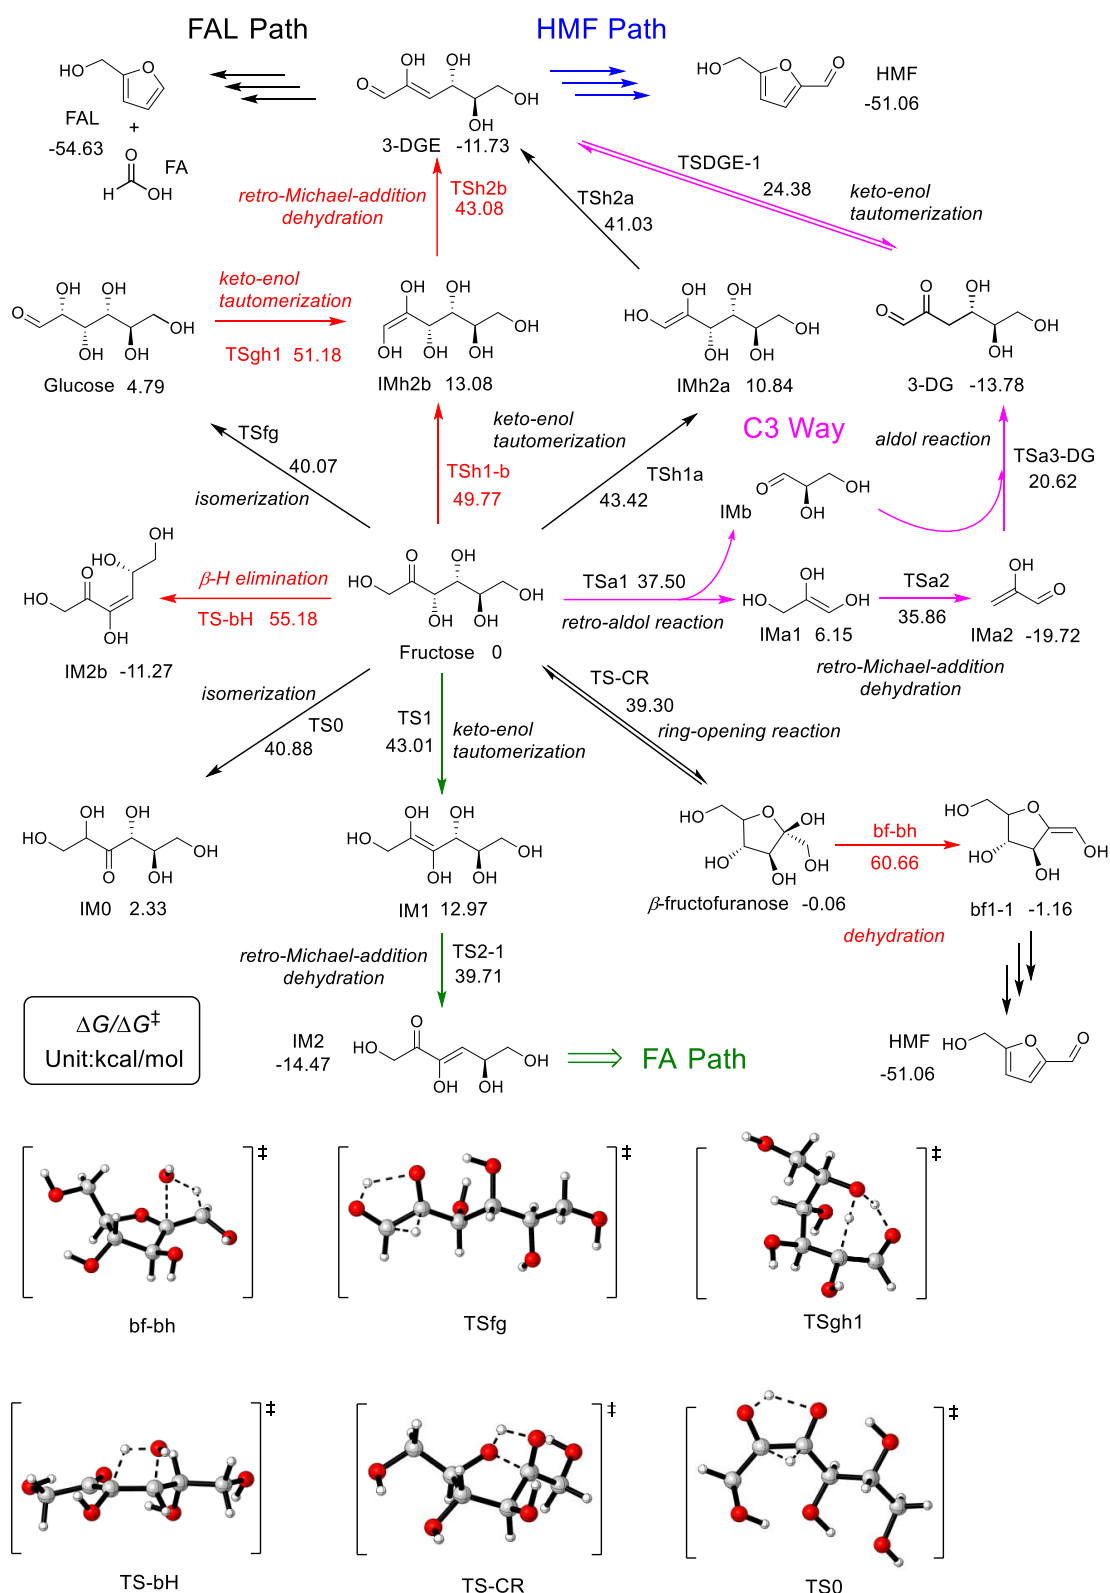

**Figure S9.** The possible reactions occurred to fructose in MTHF solvent. The data of relative Gibbs free energy of structures and energy barriers ( $\Delta G/\Delta G^\ddagger$ ) was shown in the figure with unit **kcal/mol**. The reaction steps with high energy barrier (above 45 kcal/mol) were coloured in red.

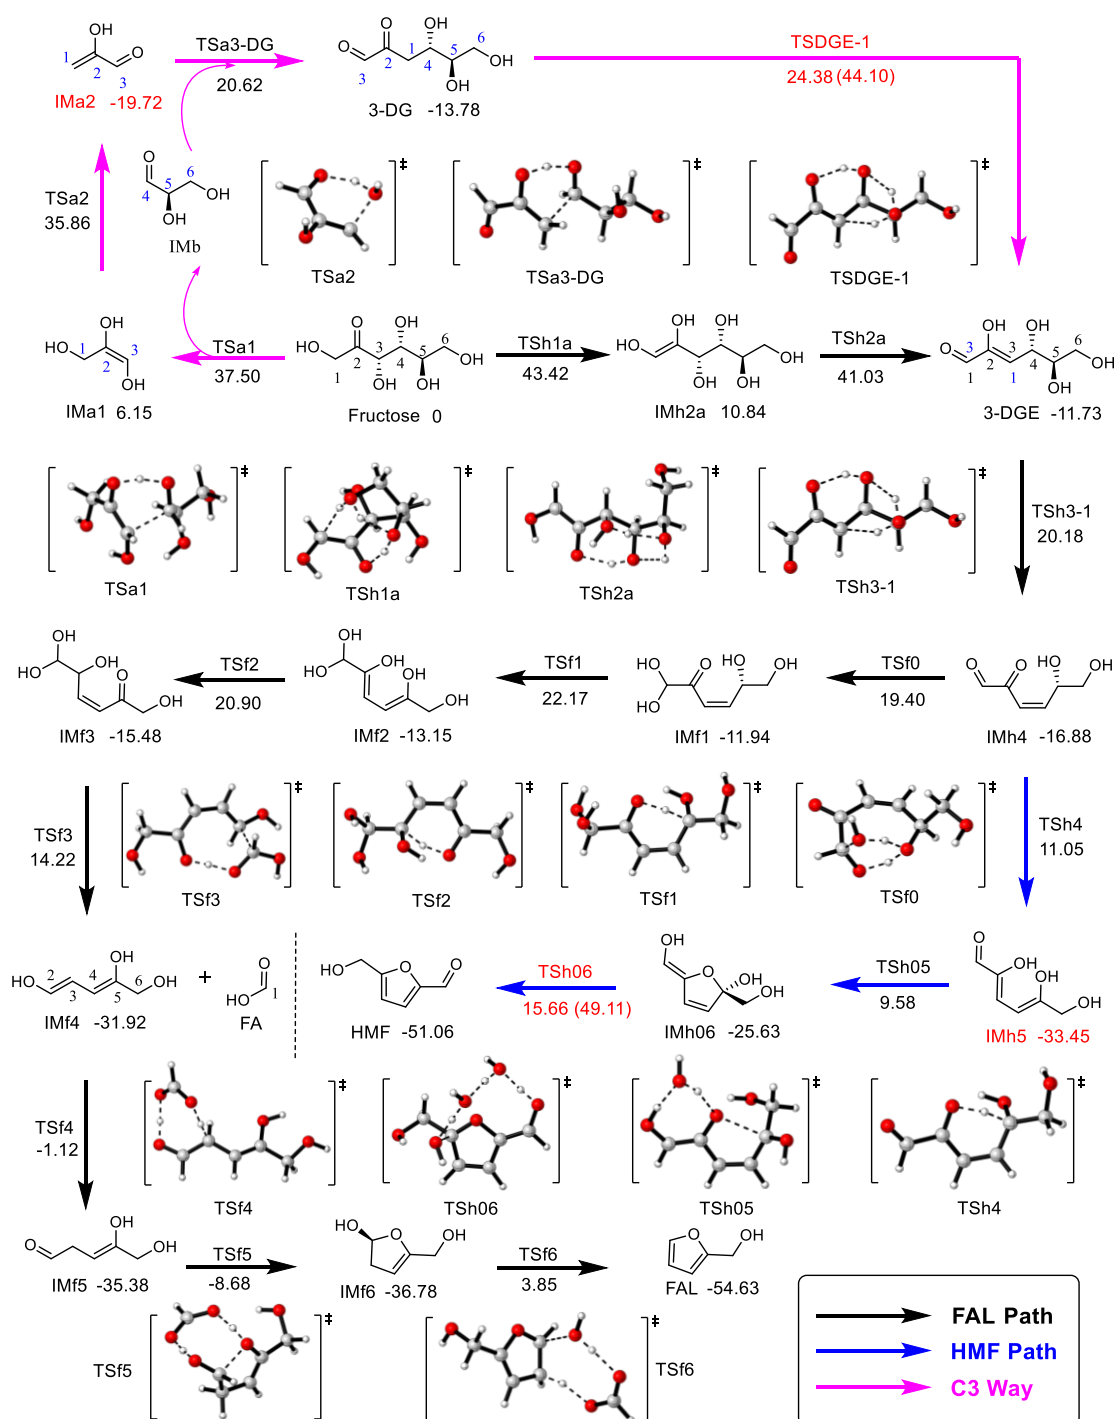

**Figure S10.** The detail pathways of **HMF Path** and **FAL Path** in MTHF. The data of relative Gibbs free energy of structures and energy barriers ( $\Delta G/\Delta G^\ddagger$ ) was shown in the figure with unit **kcal/mol**. The carbons were mainly labelled in black, and those labelled in blue showed the carbon arrangement. The RD-states for the formation of FA and HMF were coloured in red.

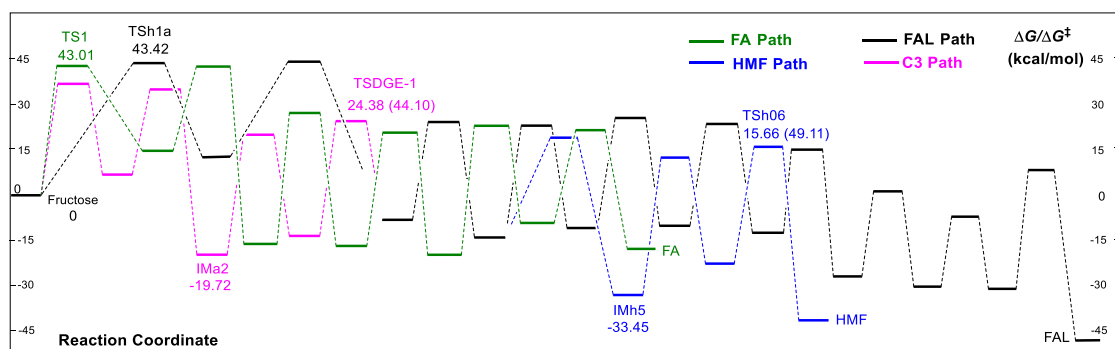

**Figure S11.** The potential-energy curves of reaction pathways for FA, FAL and HMF in MTHF. The data of relative Gibbs free energy of structures and energy barriers ( $\Delta G/\Delta G^\ddagger$ ) was shown in the figure with unit kcal/mol.

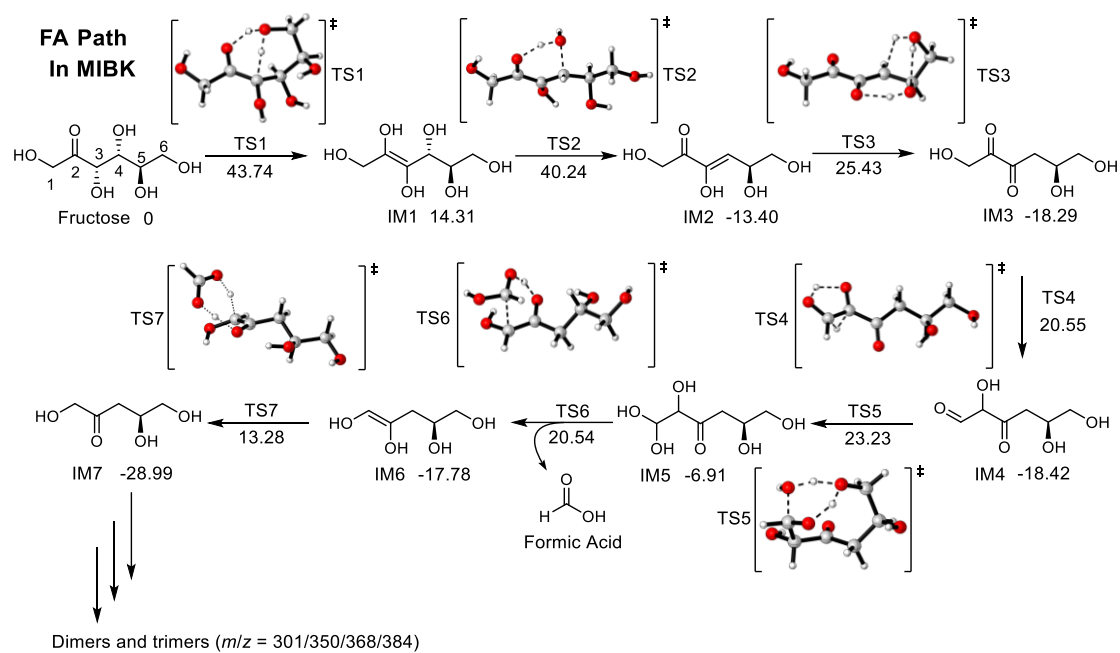

**Figure S12.** The reaction path of FA Path in MIBK solvent. The data of relative Gibbs free energy of structures and energy barriers ( $\Delta G/\Delta G^\ddagger$ ) was shown in the figure with unit kcal/mol.

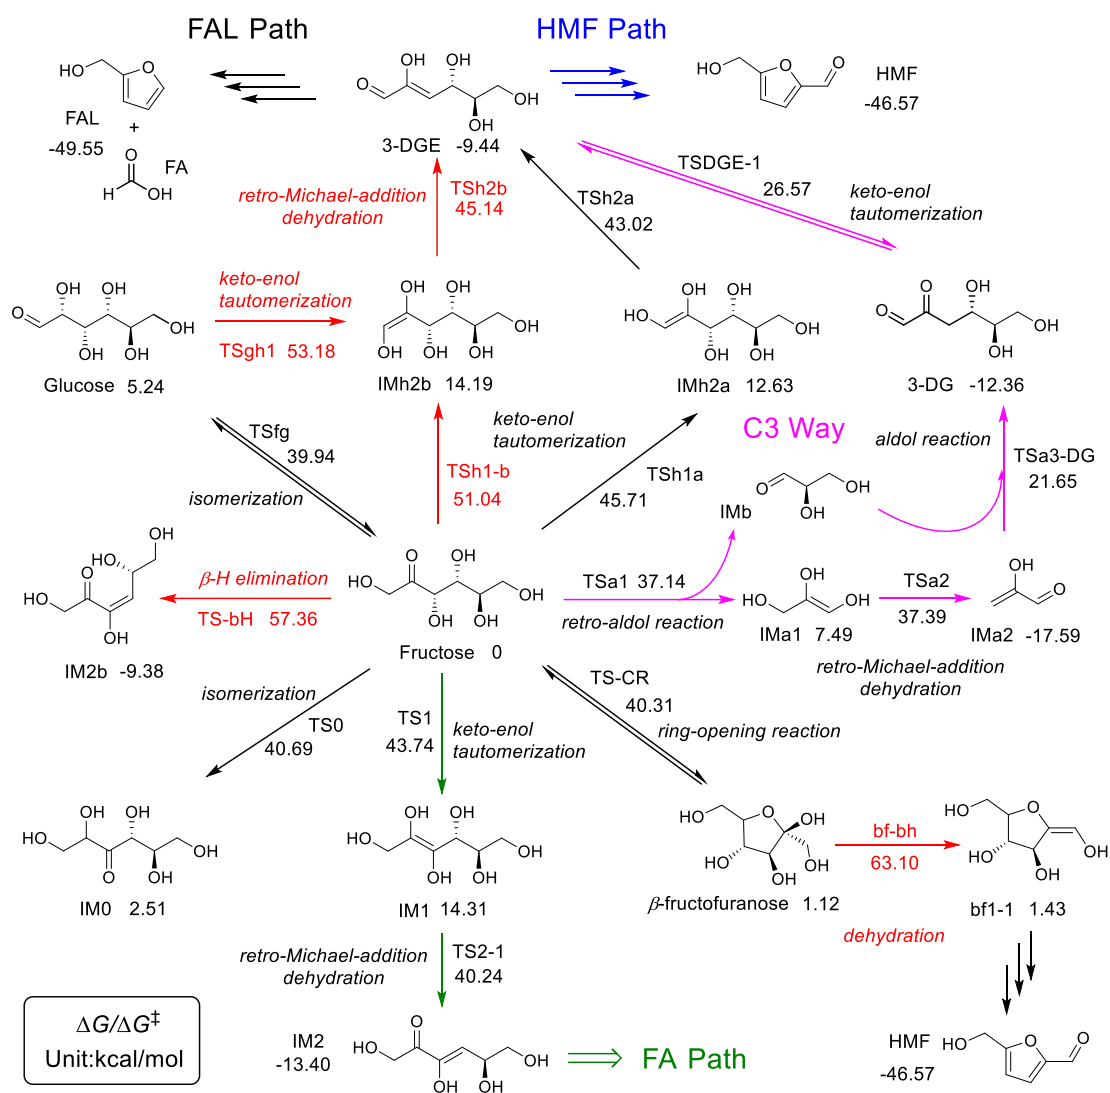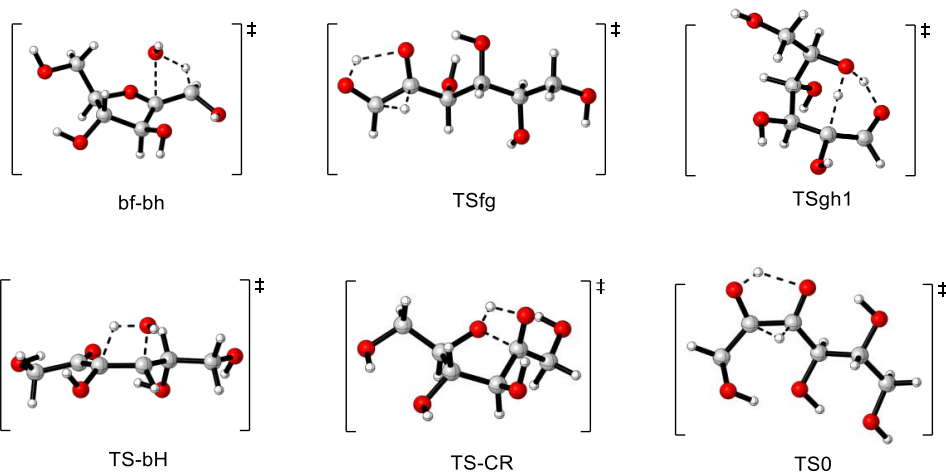

**Figure S13.** The possible reactions occurred to fructose in MIBK solvent. The data of relative Gibbs free energy of structures and energy barriers ( $\Delta G/\Delta G^\ddagger$ ) was shown in the figure with unit kcal/mol. The reaction steps with high energy barrier (above 45 kcal/mol) were coloured in red.

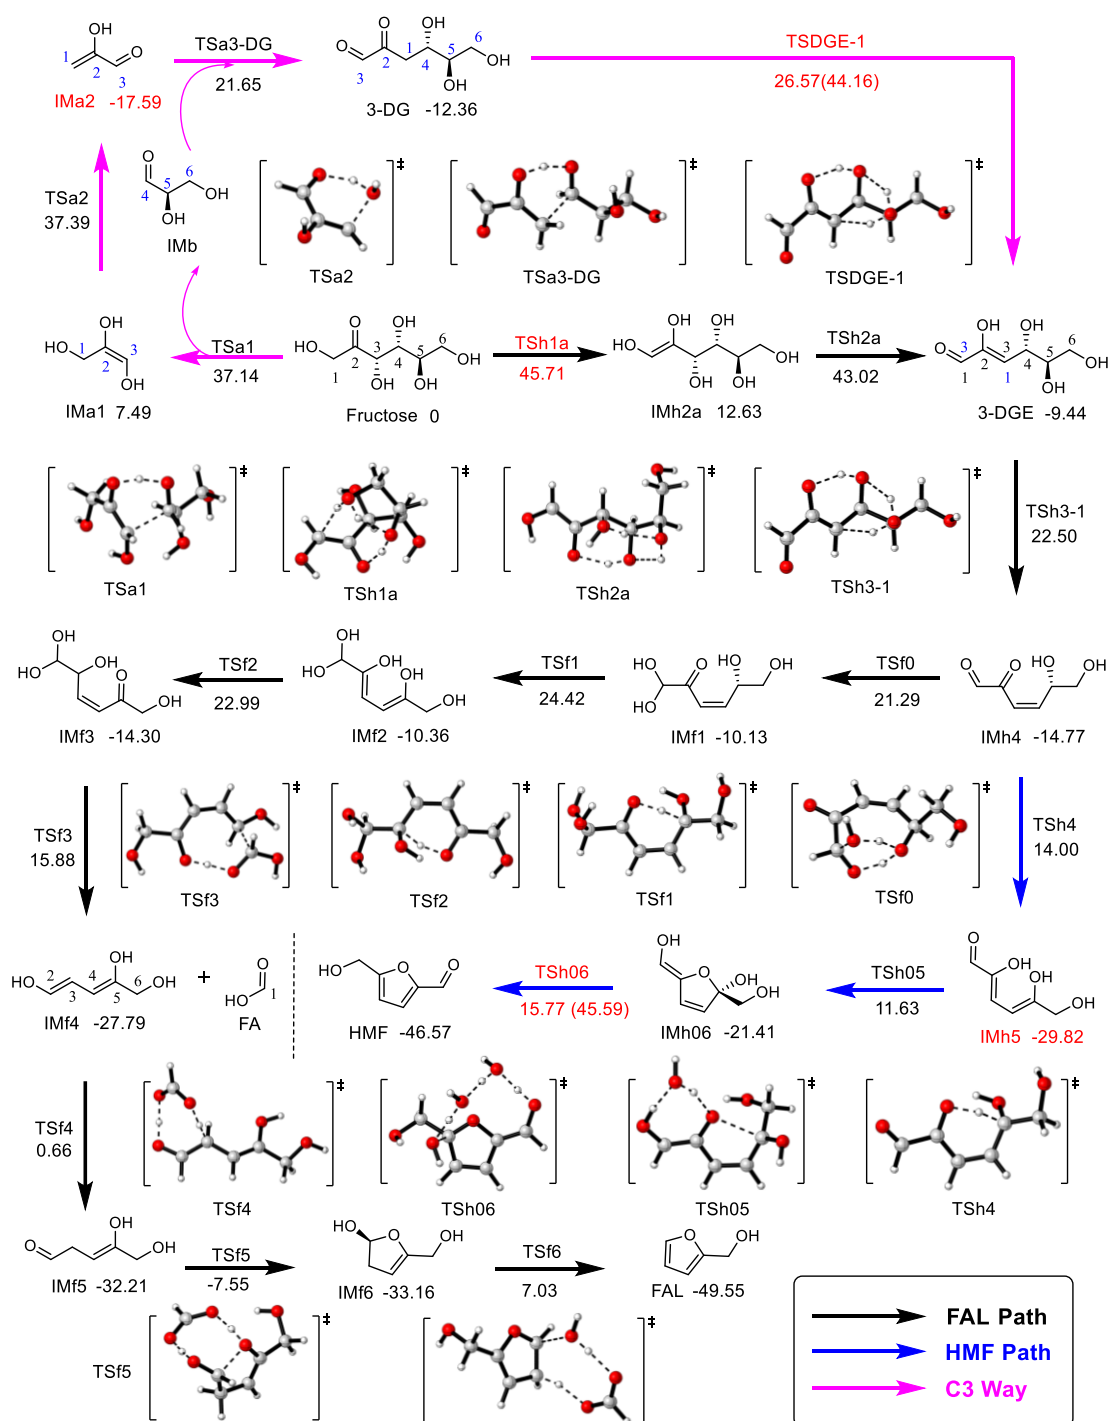

**Figure S14.** The detail pathways of **HMF Path** and **FAL Path** in MIBK. The data of relative Gibbs free energy of structures and energy barriers ( $\Delta G/\Delta G^\ddagger$ ) was shown in the figure with unit **kcal/mol**. The carbons were mainly labelled in black, and those labelled in blue showed the carbon arrangement. The RD-states for the formation of FA and HMF were coloured in red.

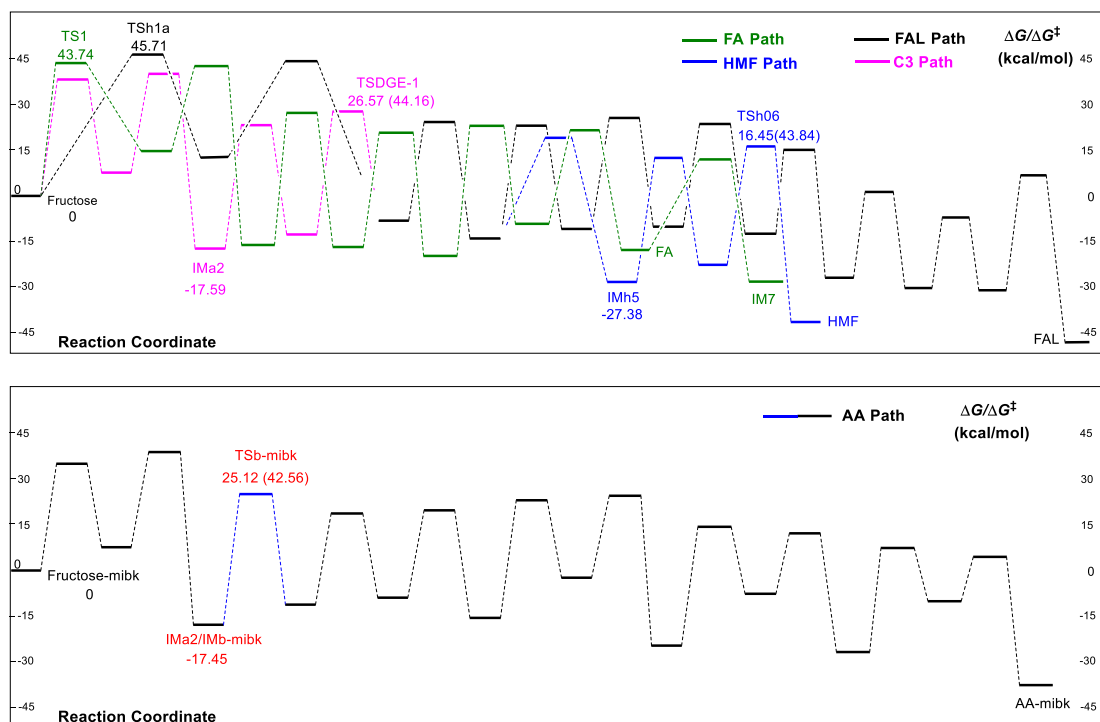

**Figure S15.** The potential-energy curves of reaction pathways for FA, FAL, HMF and AA in MIBK. The data of relative Gibbs free energy of structures and energy barriers ( $\Delta G/\Delta G^\ddagger$ ) was shown in the figure with unit **kcal/mol**.

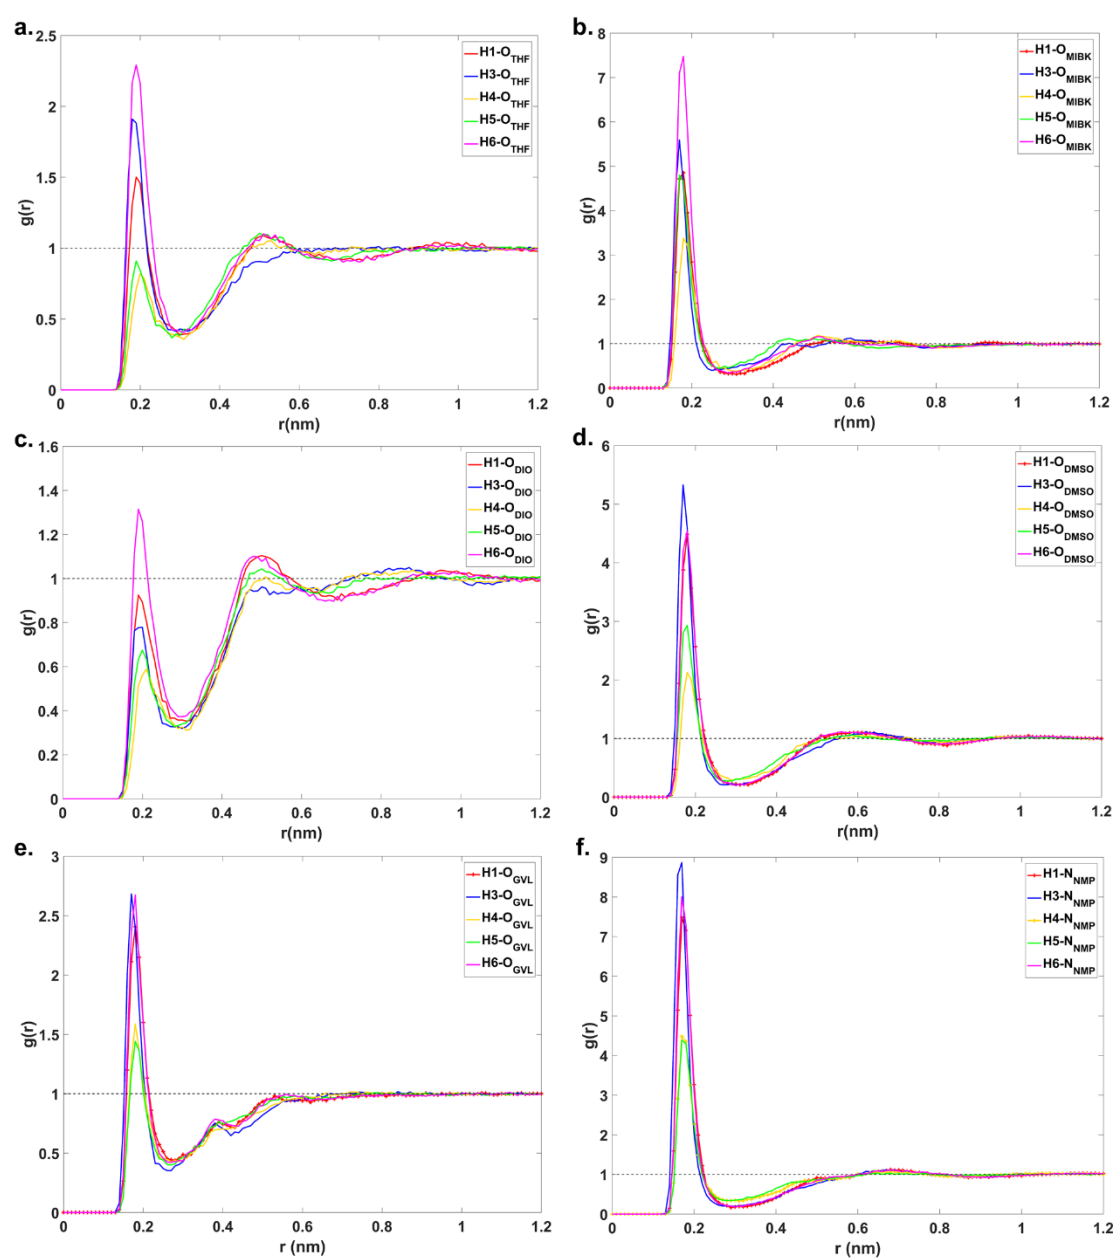

**Figure S16.** The RDF curves of O atom (N atom for NMP) on solvents from hydroxyl H atoms on fructose in different solvent. The hydroxyl H on Cn was labelled as Hn. a. THF. b. MIBK. c. DIO. d. DMSO. e. GVL. f. NMP.



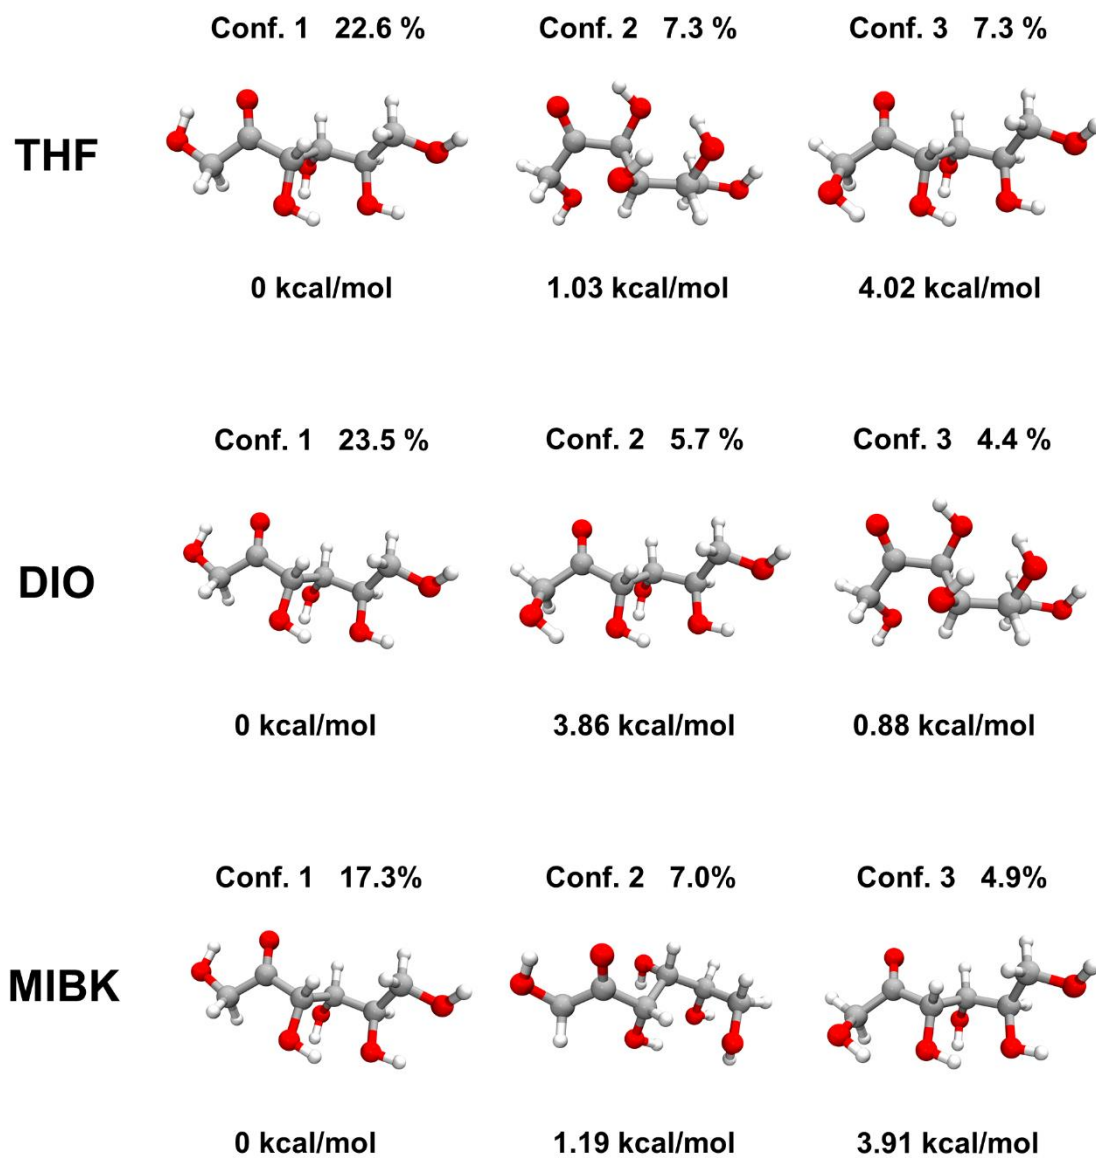

**Figure S17.** The first three main conformations of chain fructose in THF, DIO and MIBK solvent.

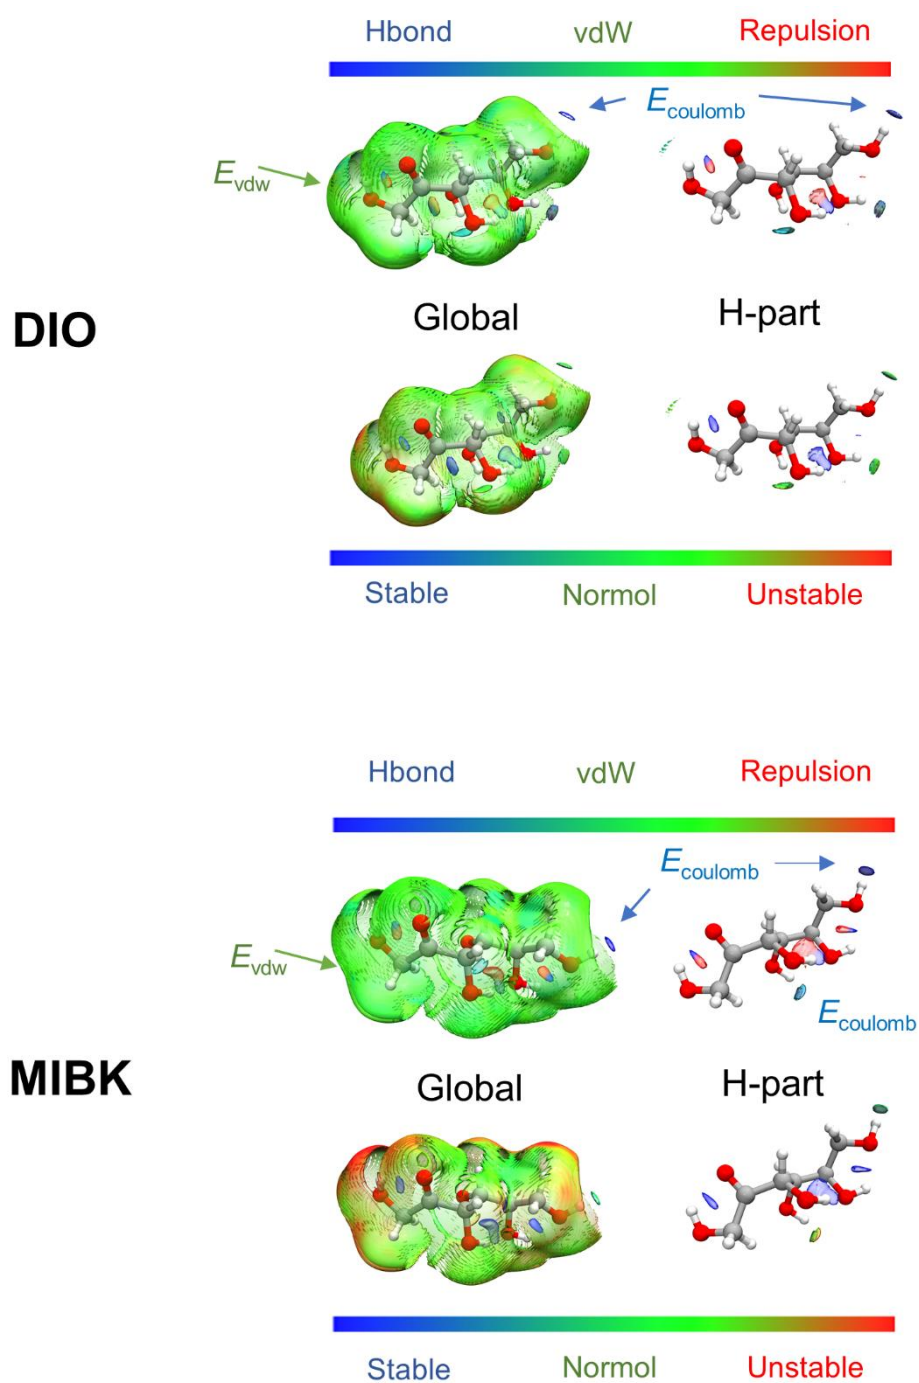

**Figure S18.** aNCI (above) and TFI (below) analysis for main conformation of acyclic keto D-fructose in DIO and MIBK solvent. Global showed the whole interactions around fructose, and to make the interactions of H-bonds more clearly, H-part showed the interactions around hydroxyl H atoms only.

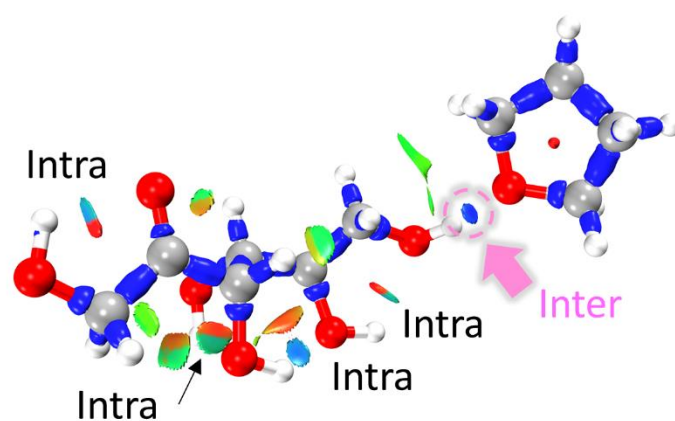

### Energy Decomposition Analysis for Intermolecular H-bond

| Frag.         | Electrostatic | vdW       |            | Total  |
|---------------|---------------|-----------|------------|--------|
|               |               | Repulsion | Dispersion |        |
| Fruuctose-THF | -40.27        | 18.26     | -19.14     | -41.16 |

**Figure S19.** Visualization of weak interactions and chemical bond interactions of main conformation keto-D-fructose in THF. Energy decomposition analysis for intermolecular H-bond based GAFF force field (unit: kJ/mol).

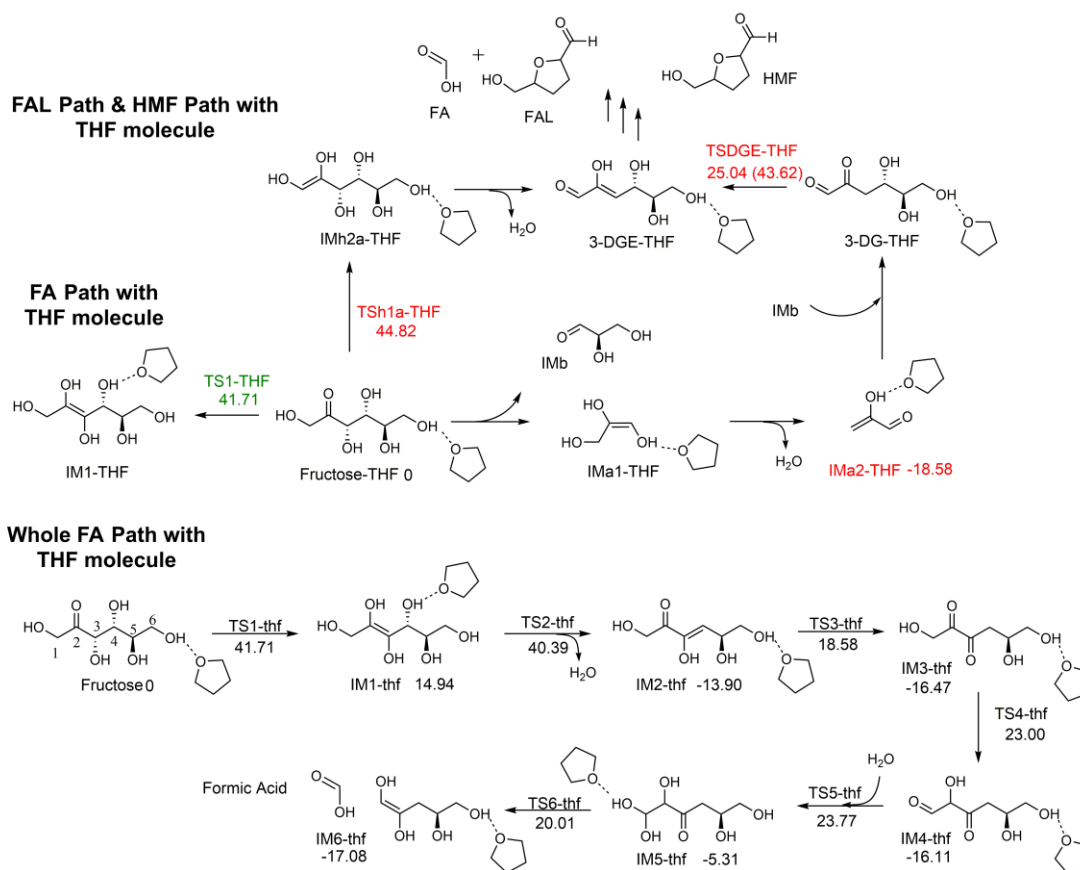

**Figure S20.** Main reaction pathways with THF explicit solvent molecule in THF. Relative Gibbs free energy unit: kcal/mol.

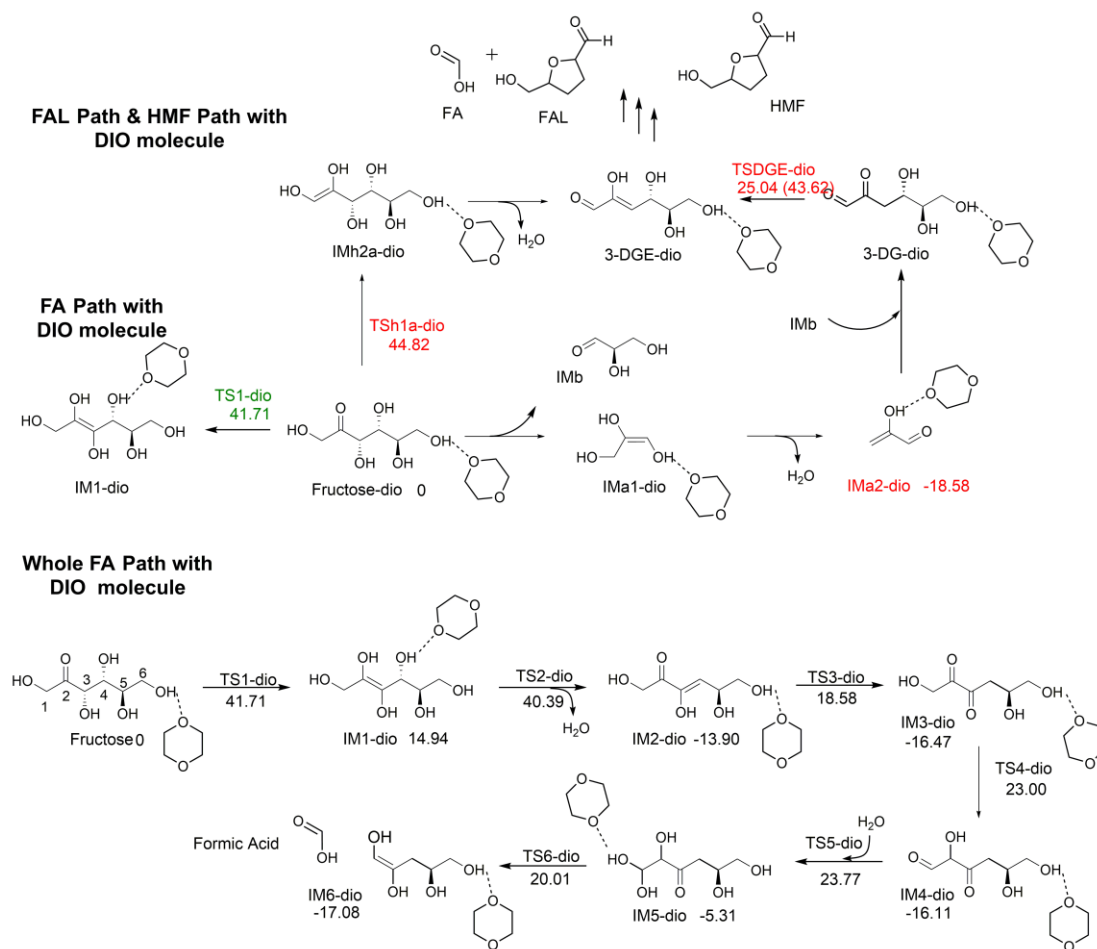

**Figure S21.** Main reaction pathways with DIO explicit solvent molecule in DIO. Relative Gibbs free energy unit: kcal/mol.

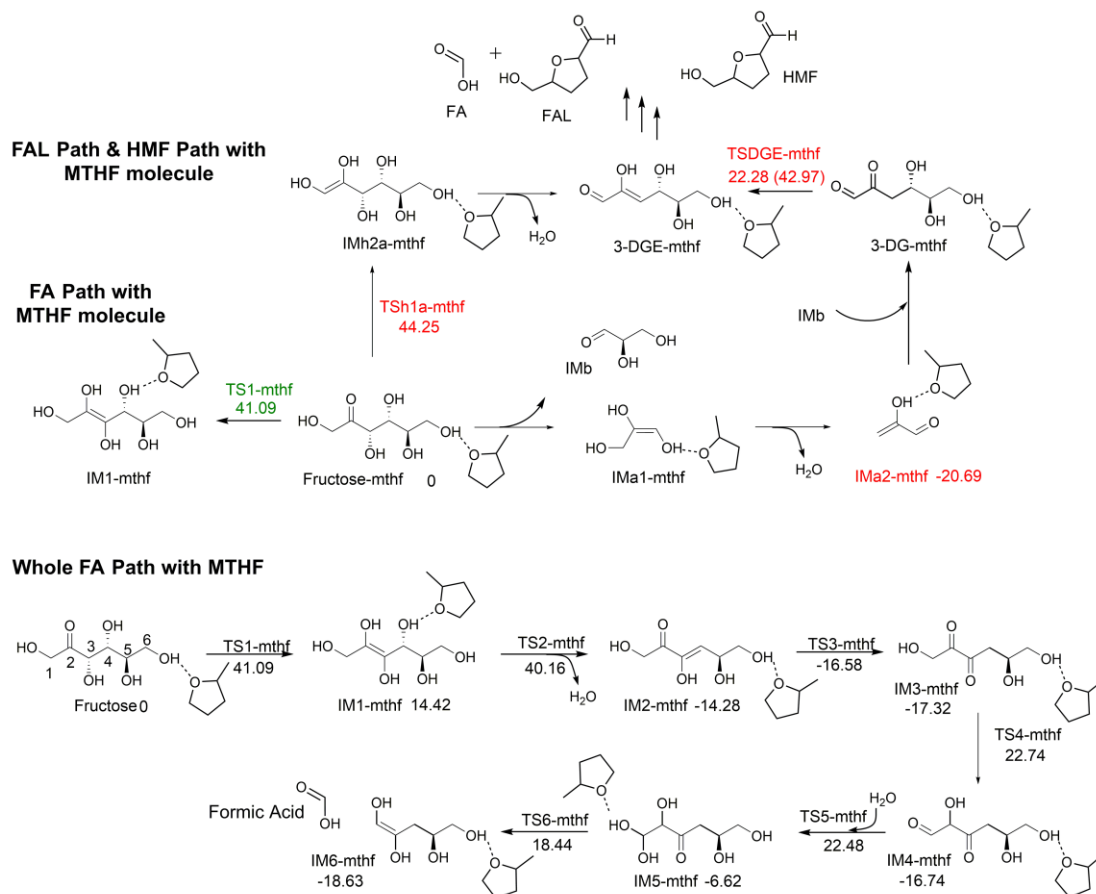

**Figure S22.** Main reaction pathways with MTHF explicit solvent molecule in MTHF. Relative Gibbs free energy unit: kcal/mol.

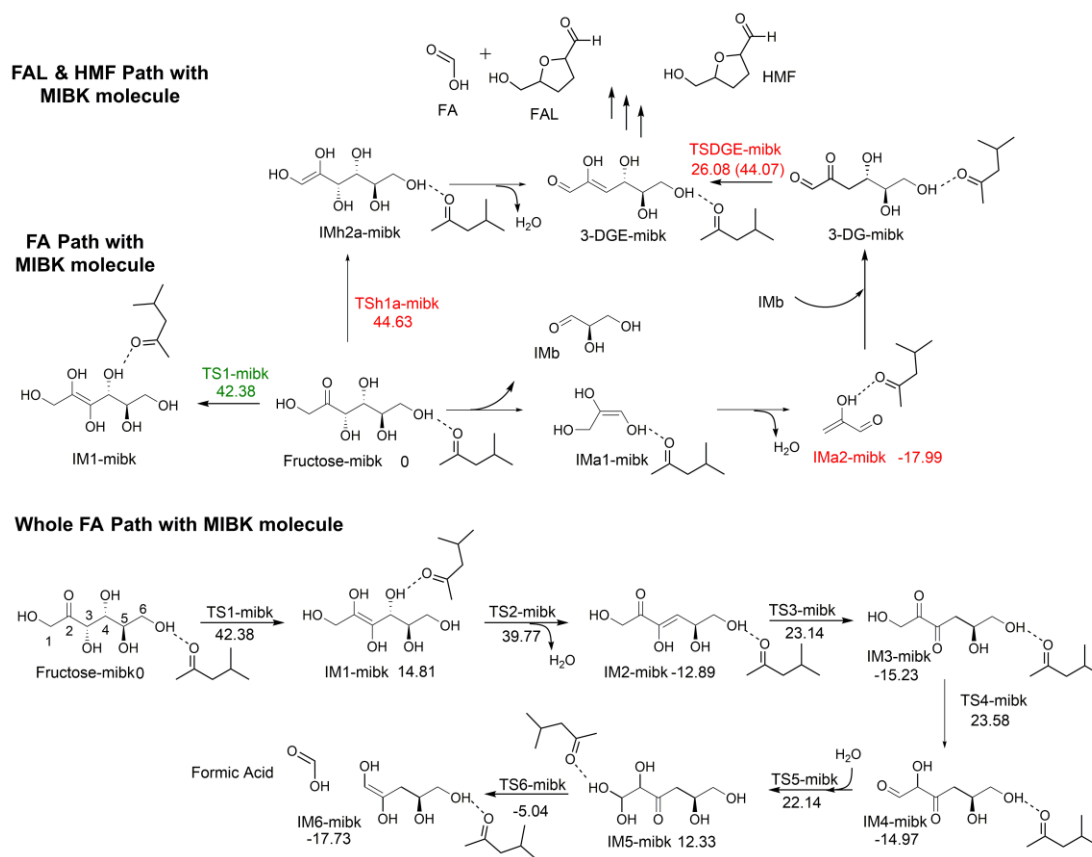

**Figure S23.** Main reaction pathways with MIBK explicit solvent molecule in MIBK. Relative Gibbs free energy unit: kcal/mol.

## Reference

1. X. Fu, Y. X. Hu, Y. R. Zhang, Y. C. Zhang, D. Y. Tang, L. F. Zhu and C. W. Hu, *Chemsuschem*, 2020, **13**, 501-512.
